# Supplementary material
Source: PubMed Central journal article supplement (PMC4468648)
Supplement: supp_mol.115.097691_supplementary_file_97691.pdf [file supp_mol.115.097691_supplementary_file_97691.pdf]

Essential role of Calmodulin in RyR inhibition by dantrolene

Y.W. Oo, N. Gomez-Hurtado, K. Walweel, D.F. van Helden, M. S. Imtiaz, B.C. Knollmann and D.R. Laver  
Molecular Pharmacology

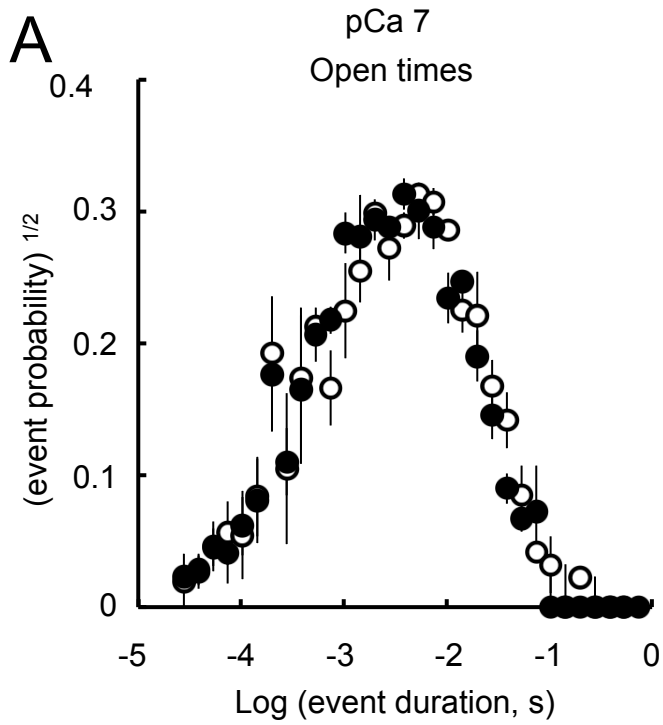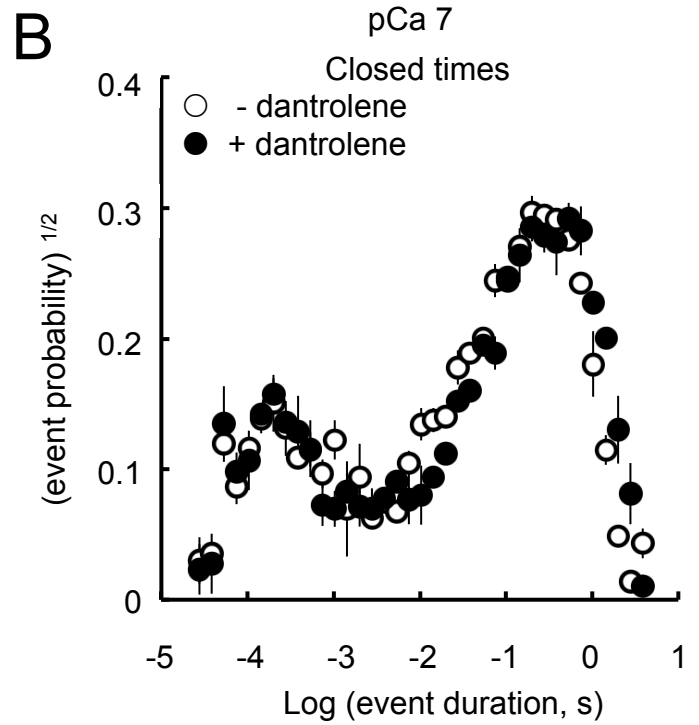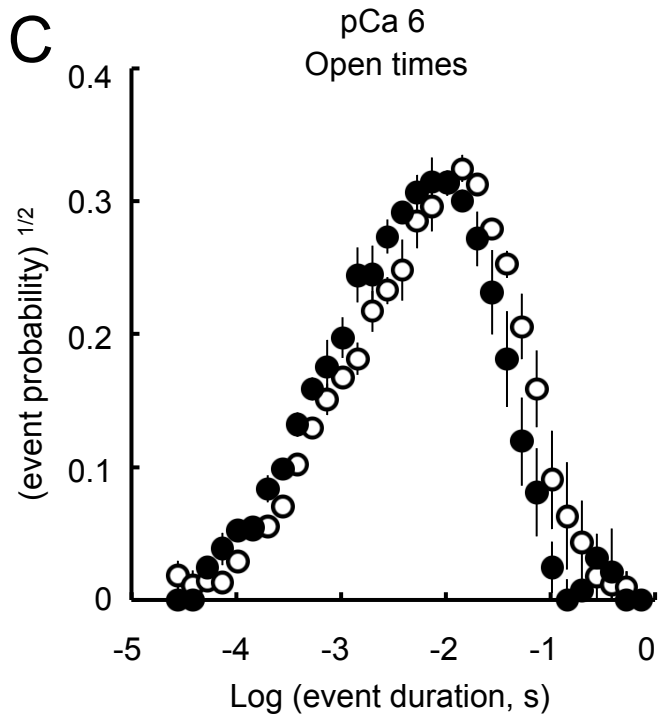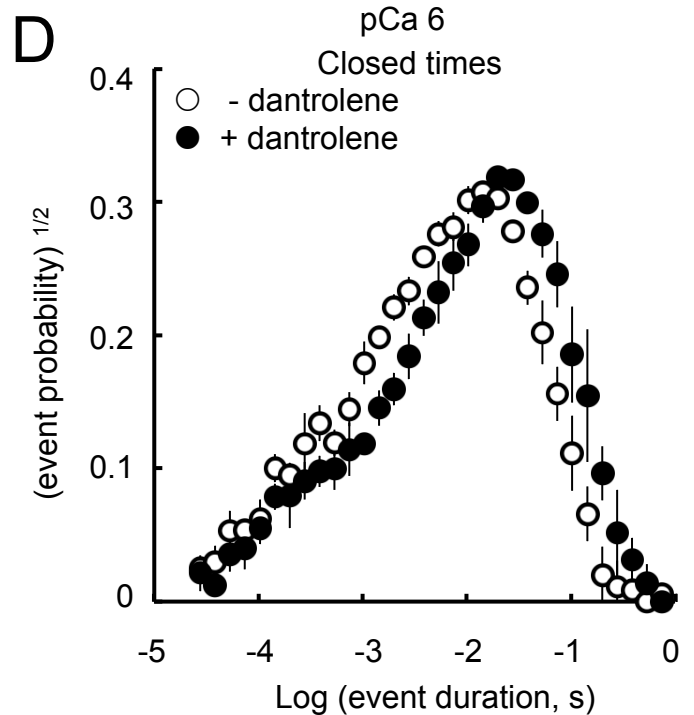

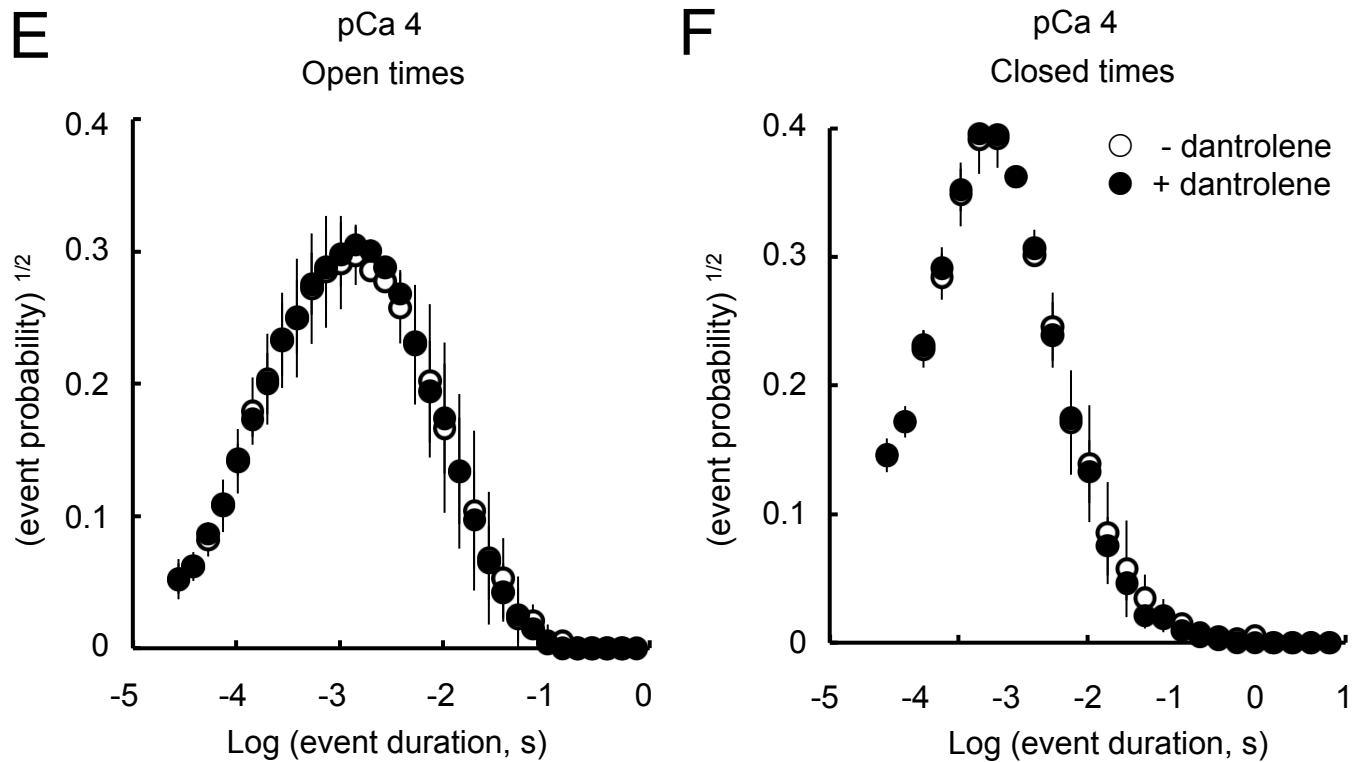

**Supplementary figure 1. Effect of dantrolene on open and closed dwell-times of RyR2.** (A,C,E) Open and (B,D,F) closed dwell-time histograms compiled using the log-bin method of Sigworth and Sine (1987). Histograms are averages of three experiments obtained in cytoplasmic  $[Ca^{2+}]$  (indicated by pCa in each panel) in the absence (○) or presence (●) of 10  $\mu$ M dantrolene. The constants of exponential constants fits to these dwell-time histograms are given in Supplementary Table 1. Figure 1C and D that the data from Figure 2A and B are re-plotted here for comparison purposes.

## Supplementary 1 (part 2)

Essential role of Calmodulin in RyR inhibition by dantrolene

Y.W. Oo, N. Gomez-Hurtado, K. Walweel, D.F. van Helden, M. S. Imtiaz, B.C. Knollmann and D.R. Laver

Molecular Pharmacology

| condition  | Fit to open dwell times |           |         |          | Fit to closed dwell times |             |         |             |
|------------|-------------------------|-----------|---------|----------|---------------------------|-------------|---------|-------------|
|            | A1<br>%                 | T1<br>ms  | A2<br>% | T2<br>ms | A1<br>%                   | T1<br>ms    | A2<br>% | T2<br>ms    |
| pCa7       | 73 ± 16                 | 3.8 ± 0.6 | 27 ± 16 | 22 ± 6   | 11 ± 3                    | 0.77 ± 0.18 | 89 ± 3  | 500 ± 100   |
| pCa7 + dan | 81 ± 12                 | 4.4 ± 1.0 | 19 ± 12 | 22 ± 5   | 8 ± 4                     | 0.37 ± 0.04 | 92 ± 4  | 700 ± 150*  |
| pCa6       | 37 ± 7                  | 8 ± 2     | 63 ± 7  | 27 ± 9   | 31 ± 5                    | 5 ± 2       | 69 ± 5  | 27 ± 6      |
| pCa6 + dan | 41 ± 17                 | 5.2 ± 0.5 | 59 ± 18 | 16 ± 1   | 35 ± 10                   | 15 ± 9      | 65 ± 10 | 50 ± 20     |
| pCa4       | 68 ± 5                  | 1.8 ± 0.4 | 32 ± 5  | 8 ± 2    | 93 ± 5                    | 0.19 ± 0.01 | 7 ± 5   | 0.91 ± 0.09 |
| pCa4 + dan | 70 ± 10                 | 1.7 ± 0.4 | 30 ± 10 | 7 ± 2    | 88 ± 3                    | 0.18 ± 0.03 | 12 ± 3  | 0.61 ± 0.08 |

Table 1. Parameter values for multi exponential fits to RyR2 dwell-time histograms ( $H(t)$ ). The conditions give the cytoplasmic  $[Ca^{2+}]$  in units of pCa in the absence and presence of 10  $\mu$ M dantrolene. T1 and T2 are the exponential time constants and A1 and A2 give fraction of dwell times in each exponential where  $A1 + A2 = 100\%$ . Asterisks indicate significant difference to absence of dantrolene in paired t-test (\*  $p < 0.05$ ). The equation is:  $H(t) = A1 T1. \exp(-t/T1) + A2 T2. \exp(-t/T2)$
